# Supplementary material for: One-pot synthesis of microporous nanoscale metal organic frameworks conjugated with laccase as a promising biocatalyst
Source: Royal Society of Chemistry journal article supplement (doi:10.1039/c7nj03619a), 2018-01-01
Supplement: c7nj03619a1.pdf [file c7nj03619a1.pdf]

Supporting Information

**One pot synthesis of microporous nanoscale metal organic frameworks conjugated laccase as a promising biocatalyst**

**Arpita Samui, Sumanta Kumar Sahu\***

Department of Applied Chemistry, Indian Institute of Technology (ISM), Dhanbad 826004, Jharkhand, India.

\* Corresponding author. E-mail: [sksahu@iitism.ac.in](mailto:sksahu@iitism.ac.in), [sumantchem@gmail.com](mailto:sumantchem@gmail.com); Fax: +91 326-2307772; Tel: +91 3262235936

---

**1. Study of morphology of NMOFs:**

The effect of laccase immobilization on morphology of NMOFs is scrutinized by preparing  $\text{NH}_2\text{-MIL-53(Al)}$ /laccase was prepared using different amount of laccase (20 mg, 30 mg, 40 mg, and 50 mg) and FESEM image of the particle shown in Fig. S1. It is revealed that laccase concentration has no effect on the morphology of the NMOFs and the particle size is also remain almost same as  $\text{NH}_2\text{-MIL-53(Al)}$ .

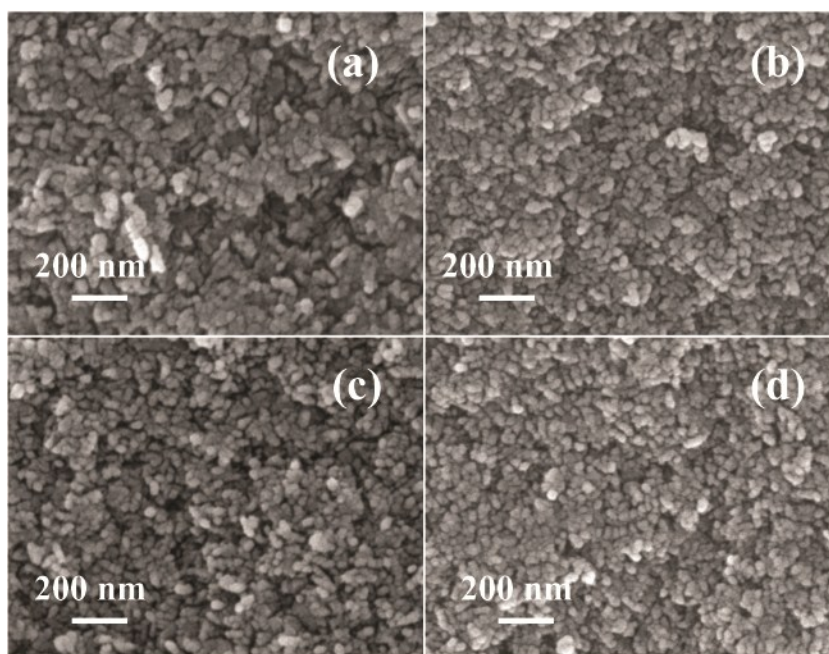

**Figure S1.** FESEM image of NH<sub>2</sub>-MIL-53(Al)/laccase at laccase amount (a) 20 mg (b) 30 mg (c) 40 mg (d) 50 mg.

## 2. FTIR Study

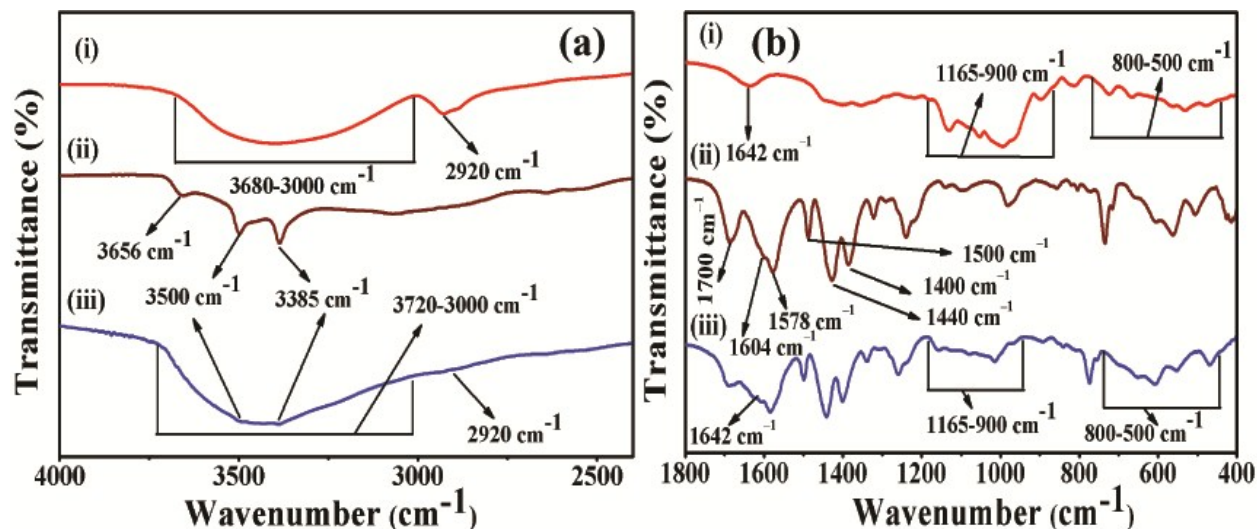

**Figure S2.** FTIR spectra of (i) laccase, (ii) NH<sub>2</sub>-MIL-53(Al) and (iii) NH<sub>2</sub>-MIL-53(Al)/laccase

**Table S1** Characteristics infrared bands of NH<sub>2</sub>-MIL-53(Al)

| Approximate frequency (cm <sup>-1</sup> ) | Functional group                   | Reference |
|-------------------------------------------|------------------------------------|-----------|
| 3656                                      | Bridging OH group                  | 43        |
| 3500, 3385                                | NH <sub>2</sub> group              | 43, 44    |
| 1604, 1578                                | Carboxylate group coordinate to Al | 43        |
| 1700, 1500                                | Assymetric stretching of C=O group | 44        |
| 1440, 1400                                | symmetric stretching of C=O group  | 44        |

**Table S2** Characteristics infrared bands of laccase

| <b>Approximate frequency (cm<sup>-1</sup>)</b> | <b>Functional group</b> | <b>Reference</b> |
|------------------------------------------------|-------------------------|------------------|
| 3680–3000                                      | OH and NH stretching    | 45, 46           |
| 2920                                           | CH stretching           | 45, 46           |
| 1642–500                                       | Peptide linkage         | 46–48            |

**Table S3** Characteristics infrared bands of peptide linkage (J. Kong, S. Yu, *Acta Biochimica et Biophysica Sinica* 39(8) (2007) 549-559)

| <b>Designation</b> | <b>Approximate frequency (cm<sup>-1</sup>)</b> | <b>Description</b>        |
|--------------------|------------------------------------------------|---------------------------|
| <b>Amide A</b>     | 3300                                           | NH stretching             |
| <b>Amide B</b>     | 3100                                           | NH stretching             |
| <b>Amide I</b>     | 1600–1690                                      | C=O stretching            |
| <b>Amide II</b>    | 1480–1575                                      | CN stretching, NH bending |
| <b>Amide III</b>   | 1229–1301                                      | CN stretching, NH bending |
| <b>Amide IV</b>    | 625–767                                        | OCN bending               |
| <b>Amide V</b>     | 640–800                                        | Out-of-plane NH bending   |
| <b>Amide VI</b>    | 537–606                                        | Out-of-plane C=O bending  |

### 3. Loading capability study

Loading capability of NMOFs is optimized using described procedure. Different amount of laccase (10 mg, 20 mg, 30 mg, 40 mg, and 50 mg) and a constant amount of NMOFs precursor

was used for each batch of synthesis. Then a fixed amount of laccase immobilized NMOFs was collected from the reaction pot and washed well. Then the activity was studied using ABTS activity assay. The activities are compared with free laccase, shown in Fig. S3. It is observed from activity efficiency that 625 mg laccase was loaded in 1 g NMOFs.

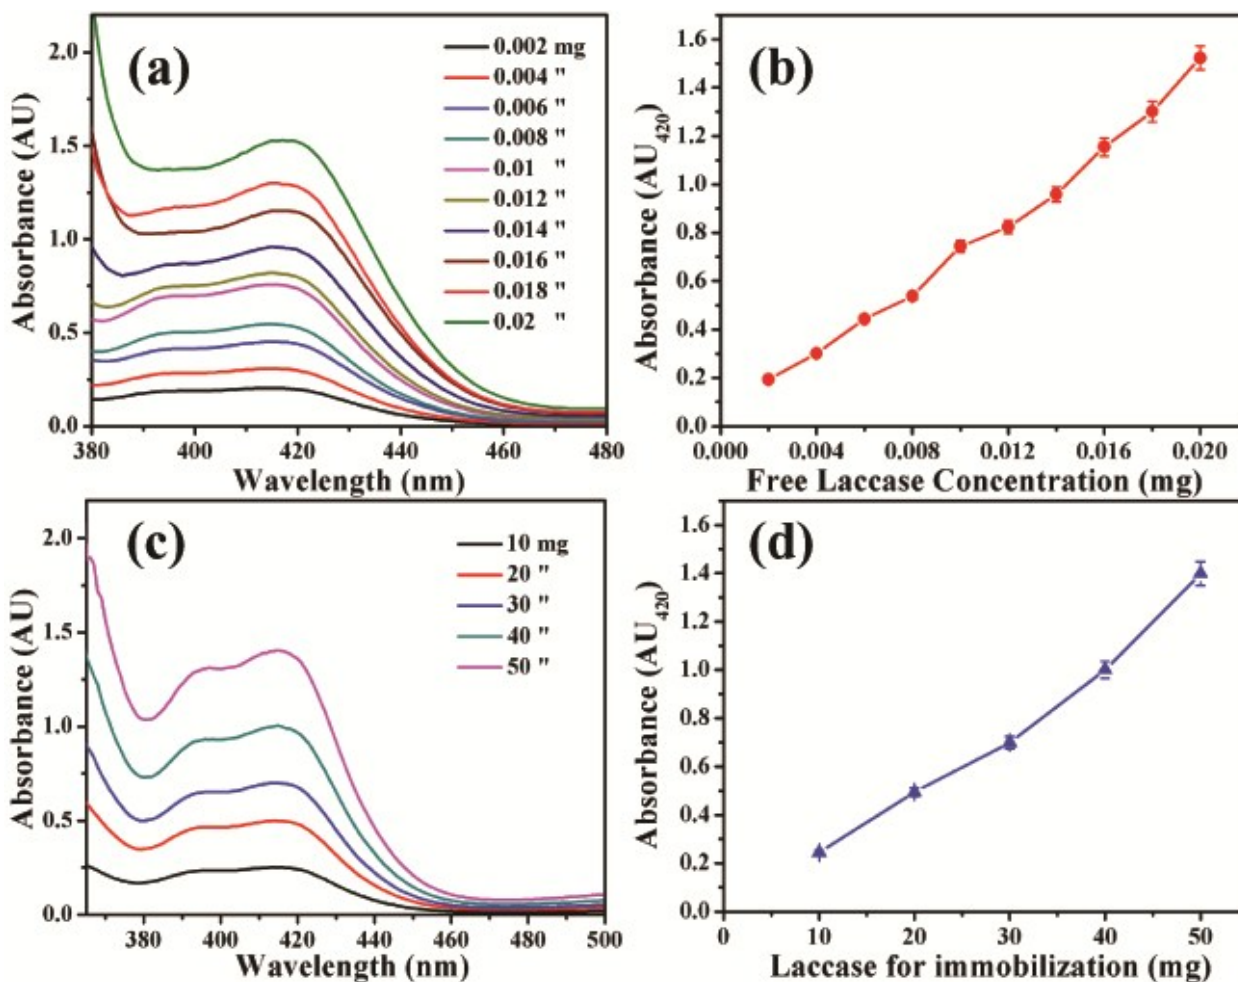

**Figure S3.** (a) UV spectra at different concentration free laccase, (b) the plot of AU<sub>420</sub> versus free laccase concentration, (c) UV spectra with respect to different concentration laccase taken at time of onepot synthesis, (d) the plot of AU<sub>420</sub> versus laccase concentration taken for immobilization.

#### 4. Kinetic study

**Table S4** Kinetic parameters of free and immobilized laccase

| Support                               | Kinetic Parameters |                     |                           |                           | Reference                           |
|---------------------------------------|--------------------|---------------------|---------------------------|---------------------------|-------------------------------------|
|                                       | $K_m$              |                     | $V_{max}$                 |                           |                                     |
|                                       | Free laccase       | Immobilized laccase | Free laccase              | Immobilized laccase       |                                     |
| NH <sub>2</sub> -MIL-53(Al)           | 0.545 mM/mL        | 0.8037 mM/mL        | 0.4418 mM/(mg min)        | 0.4765 mM/(mg min)        | This work                           |
| MNPs                                  | 1.3 mM             | 2 mM                | 56 mM/min                 | 28 mM/min                 | S. Rouhani et al. <sup>33</sup>     |
| PAN/O-MMT composite nanofibrous       | 120.32 $\mu$ M     | 622.15 $\mu$ M      | 595.24 $\mu$ mol/(mg min) | 293.46 $\mu$ mol/(mg min) | G. Li et al. <sup>40</sup>          |
| SiO <sub>2</sub> nanoparticles        | 29.3 $\mu$ M       | 46.5 $\mu$ M        | 1,890 $\mu$ mol/(min mg)  | 1,630 $\mu$ mol/(min mg)  | S. K. S. Patel et al. <sup>51</sup> |
| Cu(II)-chelated magnetic microspheres | 98 $\mu$ mol/L     | 205 $\mu$ mol/L     | 578 $\mu$ mol/(mg min)    | 293 $\mu$ mol/(mg min)    | J. Lin et al. <sup>52</sup>         |
| Mn(II)-chelated magnetic microspheres | 98 $\mu$ mol/L     | 215 $\mu$ mol/L     | 578 $\mu$ mol/(mg min)    | 337 $\mu$ mol/(mg min)    | J. Lin et al. <sup>52</sup>         |
